# Supplementary material
Source: ML conference proceedings conference paper supplement (https://proceedings.mlr.press/v215/persiau23a.html)
Supplement: Supplementary file 1 [file persiau23a-supp.pdf]

## Appendix A. Technical Lemmas and Proofs

**Lemma 18** *For any non-degenerate prequential situation  $v = (i, w) \in (\mathcal{F}_r \times \mathcal{X})^*$  and any non-negative superfarthingale  $F \in \overline{\mathbb{F}}$ ,  $F(v) \leq \prod_{k=1}^{|w|} \frac{1}{(\max \iota_k)^{w_k} (1 - \min \iota_k)^{1-w_k}} F(\square)$ .*

**Proof** Consider any non-degenerate prequential situation  $vI_r x \in (\mathcal{F}_r \times \mathcal{X})^*$ . If  $x = 1$  then  $0 < \max I_r \leq 1$ , and

$$\begin{aligned} F(vI_r x) &\leq \frac{1}{\max I_r} [\max I_r F(vI_r 1) + (1 - \max I_r) F(vI_r 0)] \\ &\leq \frac{1}{\max I_r} \overline{E}_{I_r}(F(vI_r \cdot)) \leq \frac{1}{\max I_r} F(v). \end{aligned}$$

If  $x = 0$  then  $0 \leq \min I_r < 1$ , and

$$\begin{aligned} F(vI_r x) &\leq \frac{1}{1 - \min I_r} [\min I_r F(vI_r 1) + (1 - \min I_r) F(vI_r 0)] \\ &\leq \frac{1}{1 - \min I_r} \overline{E}_{I_r}(F(vI_r \cdot)) \leq \frac{1}{1 - \min I_r} F(v). \end{aligned}$$

Above, the first, second and third inequalities follow from the non-negativity of  $F$ , Equation (1) and the superfarthingale property, respectively. Hence,  $F(vI_r x) \leq \frac{1}{(\max I_r)^x (1 - \min I_r)^{1-x}} F(v)$ . A simple induction argument now leads to the desired result.  $\blacksquare$

**Lemma 19** *For every non-degenerate computable forecasting system  $\varphi \in \Phi$  there's a recursive natural map  $C: \mathcal{X}^* \rightarrow \mathbb{N}$  such that for every test supermartingale  $T \in \overline{\mathbb{T}}(\varphi)$  it holds that  $T(w) \leq C(w)$  for all  $w \in \mathcal{X}^*$ .*

**Proof** Define the map  $C': \mathcal{X}^* \rightarrow \mathbb{R}$  by letting  $C'(w) := \prod_{k=1}^{|w|} \frac{1}{\overline{\varphi}(w_{1:k-1})^{w_k} (1 - \underline{\varphi}(w_{1:k-1}))^{1-w_k}}$  for all  $w \in \mathcal{X}^*$ . This map is real-valued, since  $0 < \overline{\varphi}$  and  $\underline{\varphi} < 1$  by the non-degeneracy of  $\varphi$ . Since  $\varphi$  is computable,  $C'$  is computable as well. Let's now prove that  $T(w) \leq C'(w)$  for all  $w \in \mathcal{X}^*$ . Fix any situation  $w \in \mathcal{X}^*$  and any  $x \in \mathcal{X}$ . If  $x = 1$ , then

$$\begin{aligned} T(wx) &\leq \frac{1}{\overline{\varphi}(w)} [\overline{\varphi}(w)T(w1) + (1 - \overline{\varphi}(w))T(w0)] \\ &\leq \frac{1}{\overline{\varphi}(w)} \overline{E}_{\varphi(w)}(T(w \cdot)) \leq \frac{1}{\overline{\varphi}(w)} T(w). \end{aligned}$$

If  $x = 0$ , then

$$\begin{aligned} T(wx) &\leq \frac{1}{1 - \underline{\varphi}(w)} [\underline{\varphi}(w)T(w1) + (1 - \underline{\varphi}(w))T(w0)] \\ &\leq \frac{1}{1 - \underline{\varphi}(w)} \overline{E}_{\varphi(w)}(T(w \cdot)) \leq \frac{1}{1 - \underline{\varphi}(w)} T(w). \end{aligned}$$

Above, the first, second and third inequalities follow from the non-negativity of  $T$ , Equation (1) and the supermartingale property, respectively. Hence,

$$T(wx) \leq \frac{1}{\overline{\varphi}(w)^x (1 - \underline{\varphi}(w))^{1-x}} T(w).$$

A simple induction argument now shows that indeed  $T(w) \leq C'(w)$  for all  $w \in \mathcal{X}^*$ .

Since  $C'$  is a computable real map, there's a recursive rational map  $q: \mathcal{X}^* \times \mathbb{N}_0 \rightarrow \mathbb{Q}$  such that  $|C'(w) - q(w, n)| \leq 2^{-n}$  for all  $w \in \mathcal{X}^*$  and  $n \in \mathbb{N}_0$ . Let  $C: \mathcal{X}^* \rightarrow \mathbb{N}$  be defined as  $C(w) := \max\{1, \lceil q(w, 1) + 1 \rceil\}$  for all  $w \in \mathcal{X}^*$ , with  $\lceil \cdot \rceil: \mathbb{R} \rightarrow \mathbb{Z}$  the ceiling function and  $\mathbb{Z}$  the set of integer numbers. It's easy to see that  $C$  is natural-valued, positive and recursive. Furthermore, we have that  $T(w) \leq C'(w) \leq q(w, 1) + 1/2 \leq C(w)$  for all  $w \in \mathcal{X}^*$ .  $\blacksquare$

**Lemma 20** *There's a single algorithm that, upon the input of a code for a lower semicomputable map  $F: (\mathcal{F}_r \times \mathcal{X})^* \rightarrow [0, +\infty]$ , outputs a code for a lower semicomputable test superfarthingale  $F' \in \overline{\mathbb{F}}$  such that*

- (i)  $F'(v) = 0$  for all degenerate prequential situations  $v \in (\mathcal{F}_r \times \mathcal{X})^*$ ;
- (ii) for any rational forecasting system  $\varphi_r \in \Phi_r$ ,  $F'(\varphi_r[w], w) = F(\varphi_r[w], w)$  for all  $w \in \mathcal{X}^*$  for which  $(\varphi_r[w], w)$  is non-degenerate, provided that the map  $F(\varphi_r[\cdot], \cdot): \mathcal{X}^* \rightarrow \mathbb{R}$  is a positive test supermartingale for  $\varphi_r$ .

**Proof** Start from a code for the map  $F: (\mathcal{F}_r \times \mathcal{X})^* \rightarrow [0, +\infty]$  that is lower semicomputable. By Corollary 6, we can invoke a single algorithm that outputs a code  $q: (\mathcal{F}_r \times \mathcal{X})^* \times \mathbb{N}_0 \rightarrow \mathbb{Q}$  for  $F$  such that  $q(v, \bullet) \nearrow F(v)$  and  $q(v, n) < q(v, n+1)$  for all  $v \in (\mathcal{F}_r \times \mathcal{X})^*$  and  $n \in \mathbb{N}_0$ . We'll now use the code  $q$  to construct a code  $q'$  for a lower semicomputable test superfarthingale  $F' \in \overline{\mathbb{F}}$  that satisfies the requirements of the lemma.

Let  $q': (\mathcal{F}_r \times \mathcal{X})^* \times \mathbb{N}_0 \rightarrow \mathbb{Q}$  be defined by  $q'(\square, n) := 1$  and

$$q'(vI_r x, n) := \begin{cases} \max(A(v, I_r, x, n) \cup \{0\}) & \text{if } vI_r x \text{ is non-degenerate} \\ 0 & \text{if } vI_r x \text{ is degenerate,} \end{cases}$$

for all  $v = (i, w) \in (\mathcal{F}_r \times \mathcal{X})^*$ ,  $I_r \in \mathcal{F}_r$ ,  $x \in \mathcal{X}$  and  $n \in \mathbb{N}_0$ , where  $A: (\mathcal{F}_r \times \mathcal{X})^* \times \mathcal{F}_r \times \mathcal{X} \times \mathbb{N}_0 \rightarrow \{Q \subseteq \mathbb{Q} : |Q| < \infty\}$  is defined by

$$A(v, I_r, x, n) := \{q(vI_r x, m) \in \mathbb{Q} : 0 \leq m \leq n, 0 \leq q(vI_r \cdot, m) \text{ and}$$

$$\overline{E}_{I_r}(q(vI_r \cdot, m)) \leq q'(v, n)\}. \quad (6)$$

By construction, since the map  $A$  outputs finite sequences of rationals, the map  $q'$  is well-defined, non-negative and rational. It's not too difficult to see that the map  $A$ , and therefore also the map  $q'$ , is recursive.

The map  $q'$  is non-decreasing in its second argument, as we now show by induction on its first argument. We start by observing that  $q'(\square, n) \leq q'(\square, n+1)$  for all  $n \in \mathbb{N}_0$ . For the induction step, fix any  $v = (i, w) \in (\mathcal{F}_r \times \mathcal{X})^*$ ,  $I_r \in \mathcal{F}_r$ ,  $x \in \mathcal{X}$  and  $n \in \mathbb{N}_0$ , and assume that  $q'(v, n) \leq q'(v, n+1)$ . We then have to show that also  $q'(vI_r x, n) \leq q'(vI_r x, n+1)$ . This is trivial when  $vI_r x$  is degenerate; when  $vI_r x$  is non-degenerate, it follows readily from the inequality  $A(v, I_r, x, n) \subseteq A(v, I_r, x, n+1)$ , which is itself immediate from Equation (6).

For any  $n \in \mathbb{N}_0$ , the map  $q'(\bullet, n): (\mathcal{F}_r \times \mathcal{X})^* \rightarrow \mathbb{R}$  is a test superfarthingale. To prove this, we may clearly concentrate on the superfarthingale condition. Fix any  $v \in (\mathcal{F}_r \times \mathcal{X})^*$ ,  $I_r \in \mathcal{F}_r$  and  $n \in \mathbb{N}_0$ , and infer from Equation (6) that  $A(v, I_r, 1, n) = \emptyset \Leftrightarrow A(v, I_r, 0, n) = \emptyset$ , so we only need to consider two cases. If  $A(v, I_r, 1, n) = A(v, I_r, 0, n) = \emptyset$ , then  $q'(vI_r \cdot, n) = 0$ , and therefore trivially  $\overline{E}_{I_r}(q'(vI_r \cdot, n)) = \overline{E}_{I_r}(0) = 0 \leq q'(v, n)$ , where the second equality follows from C1. Otherwise, because the map  $q$  is increasing in its second argument, there's an  $m \in \{0, \dots, n\}$  such that  $\overline{E}_{I_r}(q(vI_r \cdot, m)) \leq q'(v, n)$ , with  $q(vI_r \cdot, m) = \max(A(v, I_r, \cdot, n) \cup \{0\}) \geq q'(vI_r \cdot, n)$ , where the last inequality takes into account that there may be some  $x \in \mathcal{X}$  such that  $vI_r x$  is degenerate. Hence, indeed, in this case also

$$\overline{E}_{I_r}(q'(vI_r \cdot, n)) \stackrel{\text{C5}}{\leq} \overline{E}_{I_r}(q(vI_r \cdot, m)) \leq q'(v, n).$$

As a final preliminary step, we infer from Lemma 18 that for every (non-degenerate) prequential situation  $v \in (\mathcal{F}_r \times \mathcal{X})^*$  there's some real  $B_v \in \mathbb{R}$  such that  $q'(v, n) \leq B_v$  for all  $n \in \mathbb{N}_0$ .

With this set-up phase completed, let  $F'$  be defined as  $q'(v, \bullet) \nearrow F'(v)$  for all  $v \in (\mathcal{F}_r \times \mathcal{X})^*$ ; note that  $F'(\square) = 1$ . This map is well-defined, real-valued, non-negative and lower semicomputable due to the non-decreasingness, boundedness, non-negativity and recursiveness of  $q'$  respectively, so we only need to check the superfarthingale property explicitly in order to conclude that  $F'$  is a lower semicomputable test superfarthingale. To this end, fix any  $v \in (\mathcal{F}_r \times \mathcal{X})^*$  and  $I_r \in \mathcal{F}_r$ . If we recall that the map  $q(\bullet, n): (\mathcal{F}_r \times \mathcal{X})^* \rightarrow \mathbb{R}$  is a test superfarthingale for every  $n \in \mathbb{N}_0$ , we immediately infer from C6 and the real-valuedness of  $F'$  that  $\overline{E}_{I_r}(F'(vI_r \cdot)) = \lim_{n \rightarrow \infty} \overline{E}_{I_r}(q'(vI_r \cdot, n)) \leq \lim_{n \rightarrow \infty} q'(v, n) = F'(v)$ .

We are done if we can show that  $F'$  satisfies the conditions (i) and (ii). For (i), fix any degenerate prequential

situation  $v \in (\mathcal{F}_r \times \mathcal{X})^*$  and note that then  $q'(v, n) = 0$  for all  $n \in \mathbb{N}_0$  by construction. Hence, indeed,  $F'(v) = 0$ .

For (ii), fix any rational forecasting system  $\varphi_r \in \Phi_r$ , consider the map  $T: \mathcal{X}^* \rightarrow \mathbb{R}$  defined by  $T(w) := F(\varphi_r[w], w)$  for all  $w \in \mathcal{X}^*$ , and assume that  $T$  is a positive test supermartingale. We must now show that  $F'(\varphi_r[w], w) = T(w)$  for all  $w \in \mathcal{X}^*$  for which the prequential situation  $(\varphi_r[w], w)$  is non-degenerate.

By construction,  $F'(\varphi_r[w], w) \leq F(\varphi_r[w], w) = T(w)$  for all  $w \in \mathcal{X}^*$ . Assume towards contradiction that there's some  $\overline{w} \in \mathcal{X}^*$  for which  $(\varphi_r[\overline{w}], \overline{w})$  is non-degenerate and  $F'(\varphi_r[\overline{w}], \overline{w}) < T(\overline{w})$ , implying that there's some  $\epsilon > 0$  such that  $q'((\varphi_r[\overline{w}], \overline{w}), n) + \epsilon < T(\overline{w})$  for all  $n \in \mathbb{N}_0$ . We'll use an induction argument to show that this is impossible.

Since by assumption  $q((\varphi_r[\overline{w}], \overline{w}), \bullet) \nearrow T(\overline{w}) > 0$  and  $q((\varphi_r[\overline{w}], \overline{w}), n) < q((\varphi_r[\overline{w}], \overline{w}), n+1)$  for all  $n \in \mathbb{N}_0$ , there are  $\epsilon_0, \epsilon_1, \dots, \epsilon_{|\overline{w}|} \in \mathbb{R}$  and  $n_0, n_1, \dots, n_{|\overline{w}|} \in \mathbb{N}_0$  such that

$$0 < \epsilon_0 < \epsilon_1 < \dots < \epsilon_{|\overline{w}|} < \epsilon \quad (7)$$

$$T(\overline{w}_{1:\ell}) < q((\varphi_r[\overline{w}_{1:\ell}], \overline{w}_{1:\ell}), n_\ell) + \epsilon_\ell \quad (8)$$

$$0 \leq q((\varphi_r[\overline{w}_{1:k}], \varphi_r(\overline{w}_{1:k}), \overline{w}_{1:k} \cdot), n_{k+1}) \quad (9)$$

$$q((\varphi_r[\overline{w}_{1:k}], \varphi_r(\overline{w}_{1:k}), \overline{w}_{1:k} \cdot), n_{k+1}) + \epsilon_k < T(\overline{w}_{1:k} \cdot) \quad (10)$$

for all  $k \in \{0, 1, \dots, |\overline{w}| - 1\}$  and  $\ell \in \{0, 1, \dots, |\overline{w}|\}$ . The argument starts with  $\ell := |\overline{w}|$  and  $k := |\overline{w}| - 1$ , finding  $\epsilon_\ell$  such that (7) is satisfied, and finding  $n_{k+1}$  such that (8) and (9) are satisfied. We then move to  $\ell := |\overline{w}| - 1$  and  $k := |\overline{w}| - 2$ , find  $\epsilon_\ell$  such that (7) and (10) are satisfied, and find  $n_{k+1}$  such that (8) and (9) are satisfied. And so on  $\dots$ ; these conditions are depicted below for a situation  $\overline{w} \in \mathcal{X}^*$  for which  $|\overline{w}| = 5$ .

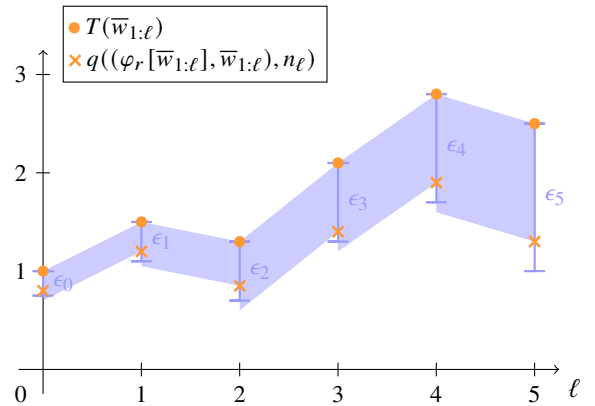

Now, let  $N := \max\{n_0, n_1, \dots, n_{|\overline{w}|}\}$ . To start the induction argument, observe that, trivially,  $q'(\square, N) = 1 > T(\square) - \epsilon_0$ . For the induction step, we fix any  $k \in \{0, 1, \dots, |\overline{w}| - 1\}$  and assume that  $q'((\varphi_r[\overline{w}_{1:k}], \overline{w}_{1:k}), N) > T(\overline{w}_{1:k}) - \epsilon_k$ . It then follows that

$$\overline{E}_{\varphi_r(\overline{w}_{1:k})}(q((\varphi_r[\overline{w}_{1:k}], \varphi_r(\overline{w}_{1:k}), \overline{w}_{1:k} \cdot), n_{k+1}))$$

$$\begin{aligned}
 &\stackrel{(10), \text{C5}}{\leq} \bar{E}_{\varphi_r(\bar{w}_{1:k})}(T(\bar{w}_{1:k} \cdot) - \epsilon_k) \\
 &\stackrel{\text{C4}}{=} \bar{E}_{\varphi_r(\bar{w}_{1:k})}(T(\bar{w}_{1:k} \cdot)) - \epsilon_k \\
 &\leq T(\bar{w}_{1:k}) - \epsilon_k \\
 &\leq q'((\varphi_r[\bar{w}_{1:k}], \bar{w}_{1:k}, N),
 \end{aligned}$$

where the penultimate inequality follows from the assumption that  $T$  is a supermartingale, and the last inequality from the induction hypothesis. Hence, by Equations (6) and (9),

$$\begin{aligned}
 &q((\varphi_r[\bar{w}_{1:k+1}], \bar{w}_{1:k+1}), n_{k+1}) \in \\
 &\quad A((\varphi_r[\bar{w}_{1:k}], \bar{w}_{1:k}), \varphi_r(\bar{w}_{1:k}), \bar{w}_{k+1}, N),
 \end{aligned}$$

which implies that

$$\begin{aligned}
 &q'((\varphi_r[\bar{w}_{1:k+1}], \bar{w}_{1:k+1}), N) \\
 &\quad \geq \max A((\varphi_r[\bar{w}_{1:k}], \bar{w}_{1:k}), \varphi_r(\bar{w}_{1:k}), \bar{w}_{k+1}, N) \\
 &\quad \geq q((\varphi_r[\bar{w}_{1:k+1}], \bar{w}_{1:k+1}), n_{k+1}) \\
 &\stackrel{(8)}{>} T(\bar{w}_{1:k+1}) - \epsilon_{k+1}.
 \end{aligned}$$

Repeating this argument until we reach  $k = |\bar{w}| - 1$ , we eventually find that  $q'((\varphi_r[\bar{w}], \bar{w}), N) > T(\bar{w}) - \epsilon_{|\bar{w}|} > T(\bar{w}) - \epsilon$ , which is the desired contradiction.  $\blacksquare$

The following result is now immediate.

**Corollary 21** *There's a single algorithm that, upon the input of a code for a lower semicomputable map  $F: (\mathcal{J}_r \times \mathcal{X})^* \rightarrow [0, +\infty]$ , outputs a code for a lower semicomputable test superfarthingale  $F' \in \bar{\mathbb{F}}$  such that, for all prequential situations  $v \in (\mathcal{J}_r \times \mathcal{X})^*$ ,*

- (i)  $F'(v) = 0$  if  $v$  is degenerate;
- (ii)  $F'(v) = F(v)$  if  $v$  is non-degenerate and  $F$  is a positive test superfarthingale.

**Proof of Theorem 17.** We'll give a proof for the first inequality, the proof for the second one is similar. Assume towards contradiction that there's some real number  $\epsilon$ , with  $0 < \epsilon < 1$ , such that

$$\liminf_{n \rightarrow \infty} \frac{\sum_{k=0}^{n-1} S(v_{1:k}, \iota_{k+1})[\omega_{k+1} - \min \iota_{k+1}]}{\sum_{k=0}^{n-1} S(v_{1:k}, \iota_{k+1})} < -\epsilon.$$

Let the map  $F := (\mathcal{J}_r \times \mathcal{X})^* \rightarrow \mathbb{R}$  be defined by

$$\begin{aligned}
 F(v) &:= \prod_{k=0}^{|\bar{w}|-1} \left[ 1 - \frac{\epsilon}{3} S(v_{1:k}, \iota_{k+1})[\omega_{k+1} - \min \iota_{k+1}] \right] \\
 &\quad \text{for all } v = (i, w) \in (\mathcal{J}_r \times \mathcal{X})^*.
 \end{aligned}$$

We'll now show in a number of steps that  $F$  is a lower semicomputable test superfarthingale for which

$\limsup_{n \rightarrow \infty} F(v_{1:n}) = \infty$ , implying that  $v$  can't be game-random.

Trivially,  $F(\square) = 1$ , and also  $F \geq 0$ , since  $\epsilon < 1$ ,  $|S| \leq 1$  and  $|x - \min I_r| \leq 1$  for all  $x \in \mathcal{X}$  and  $I_r \in \mathcal{J}_r$ . Moreover, for any  $v \in (\mathcal{J}_r \times \mathcal{X})^*$  and  $I_r \in \mathcal{J}_r$ , we have that

$$\begin{aligned}
 \bar{E}_{I_r}(F(v I_r \cdot)) &\stackrel{\text{C2}}{=} F(v) \bar{E}_{I_r} \left( 1 + \frac{\epsilon}{3} S(v, I_r) [\min I_r - X] \right) \\
 &\stackrel{\text{C2, C4}}{=} F(v) \left[ 1 + \frac{\epsilon}{3} S(v, I_r) \bar{E}_{I_r}(\min I_r - X) \right] \\
 &\stackrel{\text{C4}}{=} F(v) \left[ 1 + \frac{\epsilon}{3} S(v, I_r) (\min I_r + \bar{E}_{I_r}(-X)) \right] \\
 &\stackrel{(2)}{=} F(v),
 \end{aligned}$$

so we find that  $F$  is a test superfarthingale. From the recursiveness of  $S$  and the rational-valuedness of the forecasts  $I_r \in \mathcal{J}_r$  and outcomes  $x \in \mathcal{X}$  it follows that  $F$  is recursive, and therefore lower semicomputable as well. We conclude that  $F$  is a lower semicomputable test superfarthingale.

By assumption, for any  $m, M \in \mathbb{N}_0$ , there's some  $N > m$  such that  $\sum_{k=0}^{N-1} S(v_{1:k}, \iota_{k+1}) \geq M$  and

$$\frac{\sum_{k=0}^{N-1} S(v_{1:k}, \iota_{k+1})[\omega_{k+1} - \min \iota_{k+1}]}{\sum_{k=0}^{N-1} S(v_{1:k}, \iota_{k+1})} < -\epsilon. \quad (11)$$

This will allow us to obtain a lower bound for  $F(v_{1:N})$ . Since  $1 - \frac{\epsilon}{3} S(v, I_r)[x - \min I_r] > 1/2$  for all  $v \in (\mathcal{J}_r \times \mathcal{X})^*$ ,  $I_r \in \mathcal{J}_r$  and  $x \in \mathcal{X}$ , it holds that  $F(v_{1:N}) = \exp(K)$ , with

$$K := \sum_{k=0}^{N-1} \ln \left( 1 - \frac{\epsilon}{3} S(v_{1:k}, \iota_{k+1})[\omega_{k+1} - \min \iota_{k+1}] \right).$$

Since  $\ln(1+x) \geq x - x^2$  for all  $x > -1/2$ , we infer that

$$\begin{aligned}
 K &\geq -\frac{\epsilon}{3} \sum_{k=0}^{N-1} S(v_{1:k}, \iota_{k+1})[\omega_{k+1} - \min \iota_{k+1}] \\
 &\quad - \frac{\epsilon^2}{9} \sum_{k=0}^{N-1} S(v_{1:k}, \iota_{k+1})^2 [\omega_{k+1} - \min \iota_{k+1}]^2
 \end{aligned}$$

and, also taking into account Equation (11),  $S^2 = S$  and  $[\omega_{k+1} - \min \iota_{k+1}]^2 \leq 1$ ,

$$\begin{aligned}
 &\geq \frac{\epsilon^2}{3} \sum_{k=0}^{N-1} S(v_{1:k}, \iota_{k+1}) - \frac{\epsilon^2}{9} \sum_{k=0}^{N-1} S(v_{1:k}, \iota_{k+1}) \\
 &= \frac{2\epsilon^2}{9} \sum_{k=0}^{N-1} S(v_{1:k}, \iota_{k+1}).
 \end{aligned}$$

Hence,

$$F(v_{1:N}) \geq \exp \left( \frac{2\epsilon^2}{9} \sum_{k=0}^{N-1} S(v_{1:k}, \iota_{k+1}) \right) \geq \exp \left( \frac{2\epsilon^2}{9} M \right).$$

After recalling that the inequality above holds for any  $M \in \mathbb{N}_0$  and for arbitrarily large well-chosen  $N \in \mathbb{N}_0$ , we conclude that  $\limsup_{n \rightarrow \infty} F(\nu_{1:n}) = \infty$ . ■
